# Supplementary material
Source: publisher figshare collection journal article supplement (https://geolsoc.figshare.com/ndownloader/files/25980911)
Supplement: Supplementary file 1 [file 25980911]

## Sheet: whole rock and K-Ar
Supplementary Table 2. Geochemistry data of volcanism of SB
Volcanic field	Sample no.	Location	Age(Ma)	SiO2	TiO2	Al2O3	Fe2O3	FeO	MnO	MgO	CaO	Na2O	K2O	P2O5	LOL	total	total	source
WDLC	HL9707	Older cone of LHS	0.16	49.65	2.54	12.86	5.37	4.57	0.12	6.86	6.97	3.67	5.08	1.09	0.77	99.55	98.78	Fan et al. (1999)
WDLC	HL9720	Southmost lava flow of LHS	0.097	53.36	2.32	14.17	1.58	5.87	0.13	5.87	5.11	3.81	5.53	0.98	0.65	99.38	98.73	Fan et al. (1999)
WDLC	HL9708	N outlet of LHS lava flow	0.0003	52.88	2.31	13.56	1.77	6.11	0.12	6.89	5.81	3.58	5.06	0.89	0.68	99.66	98.98	Fan et al. (1999)
WDLC	HL9709	NW outlet of LHS lava flow	0.0003	53.34	2.32	13.85	1.04	6.66	0.12	6.09	5.31	3.85	5.4	0.96	0.74	99.68	98.94	Fan et al. (1999)
WDLC	LS3-1	basalt of lava flow from LHS E outlet	0.0003	53.48	2.43	13.88	8.15		0.12	5.92	5.49	3.68	5.7	1.06		99.91	99.91	Zou et al. (2003)
WDLC	LW5-2	basalt of lava flow from LHS W outlet	0.0003	51.08	2.53	13.2	9.04		0.13	6.86	6.57	3.83	5.39	1.15		99.78	99.78	Zou et al. (2003)
WDLC	06WD04	the east of LHS crater rim		48.55	2.24	12.72	4.76	4.54	0.16	9.1	7.46	3.73	4.63	0.84	0.68	99.41	98.73	Li et al. (2009)
WDLC	06WD05	the east of LHS crater rim		51.73	2.34	13.51	8.85	0.75	0.14	8.66	4.83	2.75	4.65	0.73	1.37	100.31	98.94	Li et al. (2009)
WDLC	HL9718	the front of LHS lava flow		52.72	2.34	14.07	2.83	5.13	0.12	6.82	5.27	3.89	5.59	0.72	0.14	99.64	99.5	Li et al. (2009)
WDLC	HL9719	the front of LHS lava flow		52.38	2.35	13.89	2.79	5.39	0.13	7.12	5.25	3.87	5.54	0.71	0.09	99.51	99.42	Li et al. (2009)
WDLC	A1	crater wall of LHS		51.3	2.14	13.27	1.86	7.72	0.15	7.27	5.86	3.8	4.85	0.95		99.17	99.17	Zhang (1984)
WDLC	L17	cone of LHS		48.2	2.16	12.85	3.13	6.83	0.15	8.19	7.18	4.77	4.45	0.88		98.79	98.79	Zhang (1984)
WDLC	HK-2	SW lava flow of HSS		50.37	2.22	13.37	9.21		0.14	7.67	7.58	3.94	4.45	1.02		99.97	99.97	Zou et al. (2003)
WDLC	HS2-2	SE lava flow of HSS		48.9	2.34	13	9.64		0.15	7.88	8.03	4.12	4.73	1.18		99.97	99.97	Zou et al. (2003)
WDLC	HN6-1	NE lava flow of HSS		51.15	2.25	13.53	9		0.13	7.25	7.12	3.82	4.51	0.93		99.69	99.69	Zou et al. (2003)
WDLC	HL9712	crater wall of HSS		50.77	2.18	13.32	2.66	5.99	0.13	7.51	7.26	3.63	4.33	0.95	0.66	99.39	98.73	Zou et al. (2003)
WDLC	H23	crater wall of HSS		50.76	1.88	13.75	4.29	5.1	0.13	7.38	6.7	3.86	4.53	0.85		99.23	99.23	Zhang (1984)
WDLC	H37	SE lava flow of HSS		49.14	2.16	13.13	1.58	8.29	0.18	7.89	7.18	4.14	4.61	1.05		99.35	99.35	Zhang (1984)
WDLC	H17	sample in HSS crater		49.94	2.34	13.23	2.99	6.18	0.17	7.9	7.59	3.85	4.23	1.01		99.43	99.43	Zhang (1984)
WDLC	06WD20	the hillside of west Jiaodebu		47.77	2.32	13.58	9.46	0.26	0.15	8.69	7.04	3.9	4.57	0.74	1.28	99.76	98.48	Li et al. (2009)
WDLC	06WD21	the tower on the top of West Jiaodebu		51.73	2.37	13.96	3.44	4.71	0.12	7.01	5.49	4.1	5.09	0.88	0.34	99.24	98.9	Li et al. (2009)
WDLC	06WD22	the foot of West jiaodebu		46.7	2.48	13.01	7.78	2.51	0.16	9.48	7.56	3.4	4.76	0.75	1.21	99.8	98.59	Li et al. (2009)
WDLC	06WD27	the top of Yaoquan		50.13	2.87	14.06	8.82	0.28	0.12	6.34	5.82	3.69	5.31	0.93	1.36	99.73	98.37	Li et al. (2009)
WDLC	HB9735	BJS	0.145	51.51	2.19	13.84	6.06	2.93	0.13	7.17	6.48	3.48	4.52	0.87	0.54	99.72	99.18	Fan et al. (1999)
WDLC	B-1a	BJS	0.286	53.71	2.21	13.94	8.09		0.1	6.12	5.9	3.32	5.19	0.9	0.16	99.64	99.48	Zhang et al. (1995)
WDLC	06WD01	the hillside of Bijia	0.445	48.75	2.29	13.98	7.6	1.64	0.14	8.51	6.74	3.22	4.51	0.72	1.82	99.92	98.1	Li et al. (2009)
WDLC	HW9747	Weishan		51.36	2.45	13.95	3.03	5.65	0.1	6.16	5.73	3.98	5.33	1.27	0.63	99.64	99.01	Fan et al. (1999)
WDLC	4506	Weishan		52.92	2.2	14.16	3.96	3.81	0.125	6.18	5.13	4.1	5.62	1.3		99.505	99.505	Heilongjiang Geological Survey (1978)
WDLC	2089	Donglongmenshan	0.57	48.06	2.18	13.18	10.35	0.27	0.175	7.88	7.54	3.58	4.68	1.12		99.015	99.015	Heilongjiang Geological Survey (1978)
WDLC	06WD17	rock pond in Longmen		50.63	2.57	15.02	4.79	4	0.13	6.85	4.98	3.01	4.96	0.72	1.94	99.6	97.66	Li et al. (2009)
WDLC	06WD19	the south flank of Xiaogu	0.32	51.69	2.24	14.09	3.66	4.28	0.11	6.61	5.05	3.54	5.2	0.69	1.71	98.87	97.16	Li et al. (2009)
WDLC	2084	Xiaogushan	0.24	52.52	2.2	14.09	3.46	5.37	0.1	6.44	5.42	3.8	5.97	0.9		100.27	100.27	Heilongjiang Geological Survey (1978)
WDLC	06WD23	the hillside of Wohu	0.274	50.92	2.2	14.11	8.39	0.38	0.13	7.11	6.35	3.86	4.17	0.77	1.65	100.04	98.39	Li et al. (2009)
WDLC	06WD25	the west top of South Gelaqiu		51.39	2.35	14.23	5.21	3.19	0.12	7.33	5.54	3.4	5.23	0.67	0.77	99.43	98.66	Li et al. (2009)
WDLC	2051	Molabushan	0.25	47.76	2.27	13.23	8.9	1.88	0.125	8.7	6.84	3.54	4.66	1.1		99.005	99.005	Heilongjiang Geological Survey (1978)
WDLC	2052	5 km south from Molabushan	0.65	52.88	1.99	13.53	2.98	5.17	0.075	6.11	5.83	3.84	5.23	0.95		98.585	98.585	Heilongjiang Geological Survey (1978)
WDLC	2058	500 m south from Wohushan	0.415	52.78	2	14.38	6.15	2.41	0.125	6.29	5.21	3.24	4.75	1		98.335	98.335	Heilongjiang Geological Survey (1978)
WDLC	2059	Wohushan	1.33	52.76	2.03	14.44	5.86	3.28	0.1	6.58	5.52	3.8	4.68	1.07		100.12	100.12	Heilongjiang Geological Survey (1978)
WDLC	2071	Dongjiaodebushan	0.42	51.04	2.23	14.06	9.6	0.25	0.125	6.44	6.36	3.59	5.05	1.17		99.915	99.915	Heilongjiang Geological Survey (1978)
WDLC	2072	1 km south from Dongjiaodebushan	0.317	51.842	2.18	13.62	4.79	4.61	0.125	6.69	5.78	3.66	5.05	1.02		99.367	99.367	Heilongjiang Geological Survey (1978)
WDLC	2069	Nangelaqiushan	0.462	52.42	2.15	14.25	6.89	1.45	0.1	6.5	5.5	4.02	5.62	0.93		99.83	99.83	Heilongjiang Geological Survey (1978)
WDLC	2068	Beigelaqiushan	0.62	52.68	2.13	14.28	3.8	4.57	0.125	6.52	5.78	4.02	5.53	0.8		100.235	100.235	Heilongjiang Geological Survey (1978)
WDLC	2121	Beigelaqiushan	0.82	50.87	2.6	14.41	3.89	5.19	0.125	6.36	5.76	3.48	5.94	1.1		99.725	99.725	Heilongjiang Geological Survey (1978)
WDLC	HY9734	Yaoquanshan	0.88	51.95	2.75	13.77	4.43	4.28	0.11	5.7	5.66	3.41	5.89	1.17	0.53	99.65	99.12	Fan et al. (1999)
WDLC	2077	Yaoquanshan		51.6	2.6	13.78	8.1	0.27	0.15	5.76	5.89	3.45	6.33	1.148		99.078	99.078	Heilongjiang Geological Survey (1978)
WDLC	2090	Xilongmenshan	1.27	54	2.18	14.35	4.68	3.499	0.125	5.78	5.1	3.45	5.45	0.81		99.424	99.424	Heilongjiang Geological Survey (1978)
WDLC	2094-4	Xilongmenshan		54.16	2.23	14.096	4.41	3.44	0.15	6.1	5.3	3.66	5.5	1.05		100.096	100.096	Heilongjiang Geological Survey (1978)
L-HS	HL9739	Lianhuashan		53.32	2.26	14.11	3.55	4.59	0.12	5.56	5.78	2.84	5.91	0.92	0.95	99.91	98.96	Fan et al. (1999)
L-HS		Lianhuashan		50.44	2.6	13.65	4.21	4.54	0.075	6.72	6.06	3.4	5.55	1		98.245	98.245	Gong et al. (2012)
L-HS		Lianhuashan		52.31	2.66	14.26	2.67	5.3	0.1	5.68	6.08	3.8	5.56	0.7		99.12	99.12	Gong et al. (2012)
L-HS		Lianhuashan		53.97	2.11	13.16	2.48	5.05	0.11	6.44	5.83	3.65	5.55	0.57		98.92	98.92	Gong et al. (2012)
L-HS		Lianhuashan		51.67	2.61	14.03	5.08	4.64	0.1	6.16	6.4	3.86	5.26	0.81		100.62	100.62	Gong et al. (2012)
WDLC	10HLJ17	LHS		50.69	2.48	13.23	9.37	0	0.12	6.41	6.82	3.33	4.94	1.1	0.98	99.47	98.49	Zhang (2016)
WDLC	06WD14	HSS		50.61	2.16	13.06	9.37	0	0.13	7.84	7.5	3.5	4.27	0.98	0.05	99.47	99.42	Zhang (2016)
WDLC	06WD30	LHS		50.06	2.26	12.84	9.49	0	0.13	8	7.16	3.63	4.78	1.1	0	99.45	99.45	Zhang (2016)
WDLC	10HLJ20	Weishan		51.75	2.43	13.55	8.49	0	0.1	6.5	5.72	3.58	5.3	1.28	0.76	99.46	98.7	Zhang (2016)
WDLC	10HLJ22	Weishan		51.8	2.44	13.69	8.56	0	0.11	6.32	5.78	3.72	5.21	1.28	0.56	99.47	98.91	Zhang (2016)
WDLC	10HLJ23	Jiaodebu		52.24	2.23	13.44	8.81	0	0.11	7.19	5.82	3.17	4.75	1.08	0.62	99.46	98.84	Zhang (2016)
XK	14Xk01			55.74	1.97	14.96	9.25		0.12	4.67	5.88	3.92	2.17	0.55	0.26	99.49	99.23	Liu et al. (2017)
XK	14Xk02			55.35	1.94	14.94	9.36		0.12	5.24	6.28	4.32	2.13	0.51	-0.1	100.09	100.19	Liu et al. (2017)
XK	14Xk03			55.86	1.89	14.78	9.36		0.12	5.11	6.19	4.19	2	0.48	0.02	100	99.98	Liu et al. (2017)
XK	14Xk06			56.95	1.72	15.39	9		0.11	4.77	6.01	3.94	1.16	0.33	0.16	99.54	99.38	Liu et al. (2017)
XK	14Xk07			56.31	1.87	14.93	8.88		0.11	4.81	5.73	3.85	2.48	0.52	0.06	99.55	99.49	Liu et al. (2017)
XK	14Xk08			55.52	1.95	15.06	9.26		0.12	5.02	5.64	4.14	2.72	0.6	-0.1	99.93	100.03	Liu et al. (2017)
XK	14Xk09			55.47	1.86	14.74	9.07		0.11	5.41	5.96	3.96	2.39	0.53	-0.2	99.3	99.5	Liu et al. (2017)
XK	14Xk10		0.66	55.81	1.88	14.75	9.02		0.11	5.55	5.92	4.23	2.44	0.53	-0.22	100.02	100.24	Liu et al. (2017)
XK	14Xk11			55.16	2.2	15.1	8.8		0.11	4.67	5.26	3.96	3.45	0.79	-0.2	99.3	99.5	Liu et al. (2017)
XK	14Xk12			54.05	1.86	15.39	9.62		0.14	5.8	6.52	4.06	1.69	0.45	0.26	99.84	99.58	Liu et al. (2017)
XK	14Xk13		1	55.54	1.8	14.89	9.25		0.12	5.59	6.36	4.46	1.92	0.46	0.74	101.13	100.39	Liu et al. (2017)
XK	14Xk14			55.4	1.82	15.01	9.3		0.12	5.59	6.18	4.18	1.94	0.47	0.16	100.17	100.01	Liu et al. (2017)
XK	14Xk15			54.94	2.24	14.76	8.8		0.11	4.29	5.37	4.1	3.39	0.78	0.84	99.62	98.78	Liu et al. (2017)
XK	14Xk16			55.77	2.4	14.86	8.42		0.1	3.82	4.86	4.2	4.02	0.95	0.46	99.86	99.4	Liu et al. (2017)
XK	14Xk17			56.14	1.86	14.78	9.47		0.12	5.13	5.96	4.17	2.21	0.48	-0.04	100.28	100.32	Liu et al. (2017)
XK	14Xk18			56.18	1.84	14.83	9.43		0.12	5.11	5.98	4.2	2.22	0.49	-0.14	100.26	100.4	Liu et al. (2017)
XK	14Xk19			55.83	1.85	14.55	9.39		0.12	5.09	5.95	4.02	2.2	0.48	0.02	99.5	99.48	Liu et al. (2017)
XK	14Xk20		0.25	55.48	1.91	14.98	9.24		0.11	5.29	6.18	4.1	2.1	0.5	0.36	100.25	99.89	Liu et al. (2017)
XK	14Xk21		0.68	56.84	1.96	14.83	9.43		0.11	4.67	5.89	4.03	1.97	0.48	0.14	100.35	100.21	Liu et al. (2017)
XK	14Xk22		1.09	56.18	1.81	15.11	9.31		0.12	5.37	6.22	4.11	1.67	0.41	0.02	100.33	100.31	Liu et al. (2017)
XK	14Xk23		0.68	56.71	1.71	15.2	9.51		0.12	4.5	6.25	4.17	1.12	0.29	0.52	100.1	99.58	Liu et al. (2017)
XK	14Xk24			55.89	1.84	15.09	9.26		0.11	4.71	6.13	3.98	1.91	0.43	0.38	99.73	99.35	Liu et al. (2017)
XK	14Xk25			57.01	1.79	15.37	9.21		0.12	4.07	6.06	4.16	1.22	0.3	0.22	99.53	99.31	Liu et al. (2017)
XK	14Xk26			56.61	1.78	15.23	9.43		0.12	5.17	6.22	4.04	1.53	0.39	-0.27	100.25	100.52	Liu et al. (2017)
XK	14Xk27		1.12	56.79	1.71	15.15	9.57		0.12	4.68	6.35	4.12	1.2	0.32	-0.14	99.87	100.01	Liu et al. (2017)
XK	14Xk29			55.74	1.71	15.52	8.55		0.11	5	6.56	4.08	1.65	0.4	0.45	99.77	99.32	Liu et al. (2017)
XK	14Xk30			56.92	1.74	15.28	9.35		0.12	4.72	6.11	4.05	1.17	0.32	0.2	99.98	99.78	Liu et al. (2017)
XK	14Xk31			56.91	1.66	15.34	9.51		0.13	4.89	6.29	4.2	1	0.28	-0.23	99.98	100.21	Liu et al. (2017)
XK	14Xk32			55.96	1.75	16.32	8.56		0.13	4.95	6.71	4.1	0.81	0.29	0.42	100	99.58	Liu et al. (2017)
XK	14Xk33			56.8	1.7	15.14	9.49		0.12	4.6	6.41	3.85	1.17	0.31	0.4	99.99	99.59	Liu et al. (2017)
EKS	09HLJ01	Erkeshan		52.02	2.49	13.43	8.71	0	0.11	6.68	5.76	3.77	5.47	1.11	0.53	100.08	99.55	Zhang (2016)
EKS	09HLJ05	Erkeshan		52.44	2.46	13.18	8.1	0	0.11	6.1	5.86	4.76	4.21	1.2	2.24	100.66	98.42	Zhang (2016)
EKS	09HLJ07	Erkeshan		52.36	2.32	13.23	8.54	0	0.11	6.72	5.62	3.78	5.3	1.01	1.07	100.06	98.99	Zhang (2016)
EKS	09HLJ08	Erkeshan	0.56	52.66	2.32	13.5	8.51	0	0.11	7.18	5.93	3.9	5.58	1.1		100.79	100.79	Zhang (2016)
EKS	10HLJ24	Xiaoshan		51.91	2.36	13.46	8.54	0	0.11	7.23	5.72	3.28	5.49	1.07	0.29	99.46	99.17	Zhang (2016)
EKS	10HLJ26	Xiaoshan		51.77	2.38	13.42	8.25	0	0.11	6.65	5.68	3.97	4.65	1.08	1.52	99.48	97.96	Zhang (2016)
EKS	Rk1			51.68	2.14	13.82	2.01	6.43	0.15	7.01	6.14	3.46	5.32	1.05		99.21	99.21	Wang et al. (1987)
EKS	Ra2			51.42	2.2	13.42	1.55	6.7	0.13	7.31	6.28	3.61	5.43	1.1		99.15	99.15	Wang et al. (1987)
EKS	Ra13			50.64	2	13.56	1.37	9.17	0.1	6.76	5.72	3.53	5.27	1		99.12	99.12	Wang et al. (1987)
EKS	Rc17			50.98	2	13.99	2.23	6.18	0.13	6.84	5.78	3.7	5.8	1.03		98.66	98.66	Wang et al. (1987)
EKS	Rc9			51.62	2	13.94	3.01	5.21	0.13	7.04	5.44	3.79	5.62	1		98.8	98.8	Wang et al. (1987)
EKS	Rc11			51.64	2	13.94	2.42	5.65	0.1	7.2	5.55	3.79	5.56	1		98.85	98.85	Wang et al. (1987)
Keluo zone 1	西4			42.06	2.32	11.51	4.79	4.67	0.14	12.08	10.89	4.04	5.12	0.38	0.9	98.9	98.3	Wang et al. (1987)
Keluo zone 1	西5			42.84	2.2	11.86	5.5	5.07	0.13	12.5	10.71	3.7	4.71	0.36	0.9	100.48	98.21	Wang et al. (1987)
Keluo zone 1	DZ-2			43.04	2	11.51	4.73	6.04	0.19	12.66	8.78	3.62	4.68	1.05	0.54	98.84	98.48	Wang et al. (1987)
Keluo zone 1	西9			43.31	2.05	12.24	4.6	4.92	0.15	12.35	10.3	3.9	4.21	1.05	0.82	99.9	97.3	Wang et al. (1987)
Keluo zone 1	DZ-6			43.44	1.8	11	3.09	7.03	0.18	14.49	8.89	3.37	4.12	0.8	0.68	98.89	97.39	Wang et al. (1987)
Keluo zone 1	H-3			43.66	2	12.56	4.55	5.55	0.16	12.21	8.44	2.82	4.25	1.1	1.78	99.08	98.68	Wang et al. (1987)
Keluo zone 1	MH3			43.78	2	12.19	3.02	6.5	0.15	12.78	9.35	3.05	3.67	0.9	1.76	99.15	98	Wang et al. (1987)
Keluo zone 1	09HLJ14	Dangzishan	4.14	43.89	2.293	11.11	10.65	0	0.154	12.16	9.66	3.62	4.299	1.058	0.6	99.494	99.58	Zhang (2016)
Keluo zone 1	西1		2.5	43.92	1.62	12.15	7.34	2.12	0.15	12.81	8.9	3.18	5.4	1.09	0.86	99.54	99.08	Wang et al. (1987)
Keluo zone 1	10HLJ40	Daheishan	1.51	43.98	2.441	11.98	10.41	0	0.151	11.07	9.29	3.106	4.941	1.064	0.59	99.023	99.04	Zhang (2016)
Keluo zone 1	H-1			44.6	2	13.52	5.99	4.4	0.18	8.55	8.38	4.39	5.27	1.2	1.08	99.56	99.77	Wang et al. (1987)
Keluo zone 1	09HLJ15	Tangzishan	2.98	44.61	2.21	11	10.41	0	0.15	12.78	9.74	3.54	4.37	1.02	0.84	100.67	99.6831	Zhang (2016)
Keluo zone 1	09HLJ32-3	Jianshan	0.98	45.55	2.27	11.76	9.97	0	0.15	11.4	9.36	3.31	2.75	0.97	1.12	98.61	99.83	Zhang (2016)
Keluo zone 1	09HLJ20	Daheishan	1.51	47.22	2.13	11.38	9.6	0	0.15	10.58	9.06	3.61	4.63	1.01	1.61	100.98	98.97	Zhang (2016)
Kuole zone 2	Dy-1			49.2	2.4	13.68	3.03	5.95	0.18	5.54	7.14	4	5.55	1.18	0.34	98.19	99.37	Wang et al. (1987)
Kuole zone 2	Dy-2			49.5	2.64	14.06	7.44	2.55	0.12	5.7	6.96	3.71	5.94	1.1	0.25	99.97	99.89	Wang et al. (1987)
Kuole zone 2	09HLJ26	Kashan	0.43	49.84	2.28	13.37	8.93	0	0.13	7.44	6.53	3.67	4.88	1.13	1.85	100.05	98.2	Zhang (2016)
Kuole zone 2	09HLJ29	Dayishan	0.147	50.35	2.64	13.18	9.14	0	0.12	5.58	6.95	4.01	5.73	1.33	0.69	99.72	98.81	Zhang (2016)
Kuole zone 2	St-1			50.46	1.8	13.13	1.53	6.8	0.1	10.46	4.76	3.62	4.95	0.85	0.52	98.98	99.03	Wang et al. (1987)
Kuole zone 2	09HLJ28	Dayishan	0.34	50.63	2.24	13.28	9.12	0	0.12	5.65	6.81	3.99	5.74	1.23	0.44	99.25	98.63	Zhang (2016)
Kuole zone 2	10HLJ42	Muhenanshan	0.96	50.64	2.092	13.47	7.86	0	0.11	6.73	5.27	4.341	5.632	0.962	1.59	98.697	97.49	Zhang (2016)
Kuole zone 2	N-1			50.94	1.7	14.06	4.74	4.91	0.1	6.19	5.78	3.96	5.05	1.1	0.64	99.17	97.107	Wang et al. (1987)
Kuole zone 2	10HLJ02	Shitougouzai		51.58	3.058	14.17	8.57	0	0.109	4.04	5.18	3.643	6.662	1.324	0.85	99.186	98.433	Zhang (2016)
Kuole zone 2	09HLJ16	Gushan	0.11	51.75	3.012	14.19	8.32	0	0.102	3.66	4.91	3.92	6.763	1.267	1.04	98.934	97.894	Zhang (2016)
Kuole zone 2	N-2			51.78	2.22	13.72	1.59	7.91	0.15	6.33	5.99	4.2	5.03	0.85	0.36	100.13	98.894	Wang et al. (1987)
Kuole zone 2	09HLJ10	Nanshan	0.26	51.84	2.26	14	8.88	0	0.11	6.18	6.65	3.52	4.59	1.01	1.32	100.36	98.336	Zhang (2016)
Kuole zone 2	09HLJ11	Nanshan	0.102	51.98	2.24	13.86	8.89	0	0.12	6.56	6.29	3.96	4.88	0.99	0.97	100.74	98.53	Zhang (2016)
Kuole zone 2	09HLJ13	Nanshan		52	2.25	13.75	9.09	0	0.12	6.54	6.3131	3.83	4.81	0.98	0.41	100.093	99.77	Zhang (2016)
Kuole zone 2	GW1			52.18	2.66	14.49	5.53	3.02	0.15	4.28	5.28	4	6.77	1.1	0.12	99.58	98.46	Wang et al. (1987)
Kuole zone 2	09HLJ17	Gushan		52.48	2.71	14.56	8.6	0	0.11	3.94	4.84	3.59	6.86	1.28	1.23	100.2	99.46	Zhang (2016)
Kuole zone 2	09HLJ22	Xiaoyishan		52.76	2.03	12.86	8.15	0	0.11	8.87	4.87	4.12	5.29	0.83	0.46	100.35	97.85	Zhang (2016)
Kuole zone 2	09HLJ31	Dayishan	0.06	53.87	2.8	14.11	8.83	0	0.11	4.41	3.09	4	6.33	1.08	1.97	100.6	99.72	Zhang (2016)
XGLH	10HLJ08	Ma'anshan		48.86	2.95	11.17	8.12	0	0.11	8.57	6.46	1.78	7.87	1.87	1.73	99.49	97.76	Zhang (2016)
XGLH	10HLJ10	Ma'anshan		48.85	2.92	11.55	8.31	0	0.12	8.45	6.27	1.59	7.53	1.4	2.52	99.51	96.99	Zhang (2016)
XGLH	10HLJ11	Ma'anshan		47.26	3.1	12.31	8.38	0	0.12	7.47	6.87	1.68	6.93	1.42	4.04	99.58	95.54	Zhang (2016)
XGLH	10HLJ13	Ma'anshan		45.96	3.15	12.08	8.31	0	0.13	8.31	6.23	1.58	7.41	2.1	4.36	99.62	95.26	Zhang (2016)
XGLH	GLH12-02			49.31	3.2	11.06	7.98		0.11	7.74	5.65	2.78	9.29	1.83	0.26	99.21	98.95	Sun et al. (2014)
XGLH	GlH12-03			48.91	3.17	10.98	7.93		0.11	7.83	5.72	2.6	9.26	1.85	0.26	98.62	98.36	Sun et al. (2014)
XGLH	GLH12-04			49.02	3.18	10.95	8.18		0.11	7.84	6.19	2.45	8.86	1.81	0.94	99.53	98.59	Sun et al. (2014)
XGLH	GLH12-05			49.65	3.18	11.19	8.18		0.11	8.05	5.78	2.06	9.08	1.35	0.7	99.33	98.63	Sun et al. (2014)
XGLH	GLH12-06			48.76	3.08	10.88	8.37		0.11	8.74	6.18	2.39	8.37	1.48	1.02	99.38	98.36	Sun et al. (2014)
XGLH	GLH12-07			48.12	3	11.11	8.67		0.11	8.88	6.65	1.71	7.82	1.73	1.28	99.08	97.8	Sun et al. (2014)
XGLH	GLH12-08			48.64	3.12	11.22	8.5		0.13	8.35	6.34	1.88	8.42	1.89	0.94	99.43	98.49	Sun et al. (2014)
XGLH	GLH12-09			48.45	3.05	10.97	8.35		0.13	8.64	6.49	2.09	8.01	1.85	1.34	99.37	98.03	Sun et al. (2014)
XGLH	GLH12-10			47.93	3.03	11.27	8.66		0.12	8.82	6.67	1.96	7.81	1.79	1.04	99.1	98.06	Sun et al. (2014)
XGLH	GLH12-11			47.98	3.03	11.01	8.64		0.11	9.02	6.66	2.6	7.8	1.77	0.76	99.38	98.62	Sun et al. (2014)
XGLH	GLH12-11R			47.91	3.02	11.03	8.61		0.12	8.99	6.65	2.6	7.78	1.77	0.74	99.22	98.48	Sun et al. (2014)
XGLH	GLH12-12			48.73	3.04	10.87	8.29		0.11	8.67	6.45	2.42	8.58	1.3	1.06	99.52	98.46	Sun et al. (2014)
XGLH	GLH12-12R			48.56	3.03	10.77	8.26		0.11	8.95	6.42	2.39	8.54	1.3	1.12	99.45	98.33	Sun et al. (2014)
XGLH	GLH12-13			48.08	3.03	10.93	8.51		0.11	9.28	6.52	2.64	8	1.79	0.62	99.51	98.89	Sun et al. (2014)
XGLH	GLH12-14			48.56	3.02	10.88	8.58		0.12	9.1	6.46	2.14	8.01	1.34	1.02	99.23	98.21	Sun et al. (2014)
XGLH	GLH12-15			48.63	3	10.87	8.49		0.12	9.13	6.66	2.39	7.93	1.32	1.28	99.82	98.54	Sun et al. (2014)
XGLH	GLH12-16			47.83	3.03	11.13	8.7		0.12	7.96	6.74	2.57	7.61	1.66	0.76	98.11	97.35	Sun et al. (2014)
XGLH	GLH12-17			50.27	3.31	11.24	8.2		0.12	8.17	5.54	1.88	9.21	1.09	1.2	100.23	99.03	Sun et al. (2014)
XGLH	GLH12-18			50.03	3.24	11.22	8.17		0.11	7.83	5.63	2.11	9.17	1.14	0.68	99.33	98.65	Sun et al. (2014)
NMH	08NM07	Ma'anshan		47.08	2.37	12.97	4.53	5.9	0.15	8.36	9.27	4.38	4.09	1.04	0.28	100.42	100.14	Fan et al. (2012)		马鞍山采渣场顶部
NMH	09NM01	Ma'anshan	0.128	48.8	2	11.9	10.01	0.35	0.14	11.66	7.16	3.43	2.12	0.69	1.3	99.56	98.26	Fan et al. (2012)		马鞍山西火口内
NMH	08NM08	Ma'anshan		46.07	2.65	13.03	4.87	6.02	0.15	6.94	10.18	4.18	4.27	1.07	0.68	100.11	99.43	Fan et al. (2012)		马鞍山南坡石塘
NMH	08NM06	Ma'anshan		49.05	2.26	11.79	3.08	7.61	0.15	11.83	7.72	3.37	2.77	0.71	0.2	100.54	100.34	Fan et al. (2012)		马鞍山采渣场
NMH	08NM05	Daerbinuo		49.85	2.19	12.65	4.47	5.65	0.15	9.9	8.13	3.33	2.77	0.73	0.28	100.1	99.82	Fan et al. (2012)		达尔毕诺
NMH	08NM17	Shenzhixia		46.93	2.1	12.36	3.71	6.65	0.15	9.69	8.67	4.18	3.75	0.94	0.24	99.37	99.13	Fan et al. (2012)		神指峡毕拉河河谷顶部
NMH	08NM16	Shenzhixia	0.58	46.02	2.16	11.82	6.82	3.87	0.23	9.86	9.42	4.24	3.84	1.07	0.66	100.01	99.35	Fan et al. (2012)		神指峡毕拉河河谷中部
NMH	08NM15	Shenzhixia		46.04	2.17	11.86	8	2.85	0.16	9.79	9.4	3.96	3.84	1.09	0.52	99.68	99.16	Fan et al. (2012)		神指峡毕拉河河谷底部
NMH	08NM03	Bilahe		49.12	2.56	12.44	3.19	7.57	0.15	9.5	7.73	4.1	3.3	0.94	0.04	100.64	100.6	Fan et al. (2012)		毕拉河渡口处
NMH	08NM01	top of Sifangshan		48.88	2.14	12.36	4.57	5.5	0.14	10.39	8.37	3.72	3.09	0.86	0.26	100.28	100.02	Fan et al. (2012)		四方山顶部
NMH	08NM10	Xiaohulutushan		47.25	2.97	12.02	3.65	7.85	0.15	9.54	8.75	3.38	2.98	0.89	0.38	99.81	99.43	Fan et al. (2012)		小土葫芦山
NMH	08NM11	West lava outlet of Xiaotuhulushan		45.78	2.74	11.51	7.17	4.28	0.15	11.2	9.35	3.37	3.03	0.83	0.46	99.87	99.41	Fan et al. (2012)		小土葫芦山西溢出口
NMH	08NM22	Matishan	0.87	46.51	2.19	11.2	3.88	6.38	0.15	13.28	8.23	3.88	3.03	0.95	0.26	99.94	99.68	Fan et al. (2012)		马蹄山东公路边
NMH	08NM21	Guolengqi		43.99	2.26	11.23	5.37	5.46	0.15	12.91	8.92	2.64	1.72	0.87	4.17	99.69	95.52	Fan et al. (2012)		果楞奇山顶部
NMH	08NM19	Guolengqi	1.24	45.91	2.14	11.05	4.8	5.68	0.15	13.7	8.08	3.47	3.02	0.92	0.52	99.44	98.92	Fan et al. (2012)		果楞奇山北侧
NMH	08NM20	Guolengqi	0.71	46.35	2.38	11.5	3.54	7.07	0.16	12.23	8.47	3.59	2.99	0.89	0.04	99.21	99.17	Fan et al. (2012)		果楞奇山坡脚
NMH	08NM12	Guolengqi	0.95	46.13	2.69	12.01	4.72	6.27	0.17	10.39	8.73	4.1	3.26	0.99	0.5	99.96	99.46	Fan et al. (2012)		果楞奇山东南3km
NMH	08NM14	Guolengqi		44.84	2.71	11.08	4.63	6.9	0.19	12.98	8.17	3.21	2.89	0.92	0.84	99.36	98.52	Fan et al. (2012)		果楞奇山东南3km
NMH	09NM15	top of Bugongqishan	1.58	47.97	2.07	11.71	4.61	5.5	0.14	11.95	7.98	3.35	2.95	0.83	0.46	99.52	99.06	Fan et al. (2012)		布宫奇山顶
NMH	08NM23	Nuominhe farm	2.3	46.74	2	11.94	4.45	5.22	0.14	11.47	7.83	4.01	3.83	0.89	0.86	99.38	98.52	Fan et al. (2012)		诺敏河农场三连
NMH	08NM24	Longtou	1.35	46.52	2.75	11.58	6.35	4.32	0.15	10.92	7.74	3.62	3.91	1.04	1.06	99.96	98.9	Fan et al. (2012)		龙头后山微波塔
NMH	08NM09	Longtou	1.08	46.26	2.8	11.6	6.19	4.6	0.15	10.97	7.81	3.7	3.79	1.05	0.96	99.88	98.92	Fan et al. (2012)		龙头诺敏河桥边
NMH	09NM10C	398 highland		47.19	2.64	11.64	3.91	6.71	0.14	11.49	7.78	3.88	3.4	0.82	0.02	99.62	99.6	Fan et al. (2012)		龙头南398高地
NMH	09NM11	Nuominhe		45.03	2.82	11.85	4.4	6.49	0.14	10.95	8.85	3.29	3.87	1.06	0.68	99.43	98.75	Fan et al. (2012)		诺敏河西侧玄武岩台地
NMH	09NM12	Nuominhe		44.81	2.99	11.83	4.72	6.3	0.15	11.07	8.75	3.26	4.13	1.15	0.3	99.46	99.16	Fan et al. (2012)		诺敏河玄武岩台地
NMH	08NM04	Yili	0.76	45.36	2.05	10.19	4.48	5.88	0.16	16.37	7.67	3.25	2.88	0.85	0.34	99.48	99.14	Fan et al. (2012)		宜里
NMH	09NM14	Yili		45.95	2.05	10.22	2.92	7.61	0.15	16.69	7.68	2.77	2.39	0.71	0.44	99.58	99.14	Fan et al. (2012)		宜里农场4队
NMH	09NM13A	Xiaosifangshan		45.08	2.52	10.97	9.08	1.71	0.14	13.58	8.19	3.79	2.96	0.71	0.6	99.33	98.73	Fan et al. (2012)		小四方山北火口沿
NMH	09NM13B	Xiaosifangshan		46.04	2.43	10.97	4.99	5.78	0.14	14.05	7.97	3.21	2.79	0.77	0.32	99.46	99.14	Fan et al. (2012)		小四方山火口内
NMH	09NM16	Boketudashan		45.8	2.16	11.45	3.82	7.03	0.15	13.28	8.97	2.87	2.62	0.79	0.5	99.44	98.94	Fan et al. (2012)		博克图大山
QXS	BBT-1	Bobotushan		42.1	2.92	12.51	13.99	0	0.18	11.39	9.13	3.65	1.34	0.72	2.8	100.72	97.93	Xu et al. (2012)
QXS	BBT-3	Bobotushan	50.1	42.83	2.9	12.58	13.82	0	0.18	11.76	8.78	3.68	1.28	0.74	1.76	100.29	98.55	Xu et al. (2012)
QXS	BBT-4	Bobotushan		42.66	2.98	12.81	13.77	0	0.18	11.35	9.52	3.03	1.48	0.63	2.2	100.6	98.41	Xu et al. (2012)
QXS	NBS-1	Aobaoshan		43.3	2.9	12.84	14.21	0	0.18	11.96	9.56	2.52	1.67	0.63	1.26	101.02	99.77	Xu et al. (2012)
QXS	NBS-2	Aobaoshan		42.84	2.84	12.44	13.81	0	0.18	11.79	9.52	2.74	1.2	0.61	1.4	99.37	97.97	Xu et al. (2012)
QXS	NBS-3	Aobaoshan	48.5	42.77	2.87	12.59	14.31	0	0.18	12.23	10.13	2.66	1.23	0.62	0.94	100.53	99.59	Xu et al. (2012)
QXS	NBS-4	Aobaoshan		43.02	2.85	12.5	14	0	0.18	12.33	9.81	2.93	1.09	0.61	1.13	100.46	99.32	Xu et al. (2012)
QXS	BLS-1	Bolishan		46.25	2.28	12.8	13.9	0	0.18	11.08	7.93	2.66	2.05	0.71	0.59	100.43	99.84	Xu et al. (2012)
QXS	BLS-2	Bolishan		45.3	2.33	12.91	13.84	0	0.18	11.67	7.79	2.86	2.1	0.73	0.64	100.34	99.71	Xu et al. (2012)
QXS	BLS-4	Bolishan		45.43	2.31	12.67	14.11	0	0.19	11.87	7.75	2.69	2.02	0.74	0.78	100.56	99.78	Xu et al. (2012)
QXS	BLS-5	Bolishan		44.68	2.31	12.5	13.92	0	0.18	12.48	7.73	2.64	1.99	0.73	1.09	100.24	99.16	Xu et al. (2012)
QXS	DHLB-1	Dahalabashan	51	47.4	1.81	14.07	14.17	0	0.19	9.32	9.11	2.88	1.14	0.45	−0.10	100.43	100.54	Xu et al. (2012)
QXS	DHLB-5	Dahalabashan		47.9	1.93	14.58	13.91	0	0.18	9.01	8.83	2.72	1.35	0.33	−0.20	100.54	100.74	Xu et al. (2012)
QXS	DHLB-8	Dahalabashan		47.01	2.03	14.54	14.56	0	0.19	9.39	9.12	2.75	1.27	0.33	−0.23	100.94	101.19	Xu et al. (2012)
QXS	DHLB-9	Dahalabashan		47.72	1.87	14.41	14.03	0	0.19	8.71	9	3.1	1.27	0.52	−0.03	100.79	100.82	Xu et al. (2012)
QXS	XHLB-1	Xiaohalabashan	50.9	46.51	2.06	14.47	14.33	0	0.19	8.51	8.35	3.34	1.83	0.53	0.3	100.4	100.12	Xu et al. (2012)
QXS	XHLB-2	Xiaohalabashan		45.75	1.86	14.22	14.21	0	0.18	8.86	8.36	3.02	1.43	0.44	2.2	100.53	98.33	Xu et al. (2012)
QXS	XHLB-5	Xiaohalabashan		46.76	1.99	14.21	14.11	0	0.19	8.88	8.04	3.29	1.66	0.52	0.53	100.18	99.65	Xu et al. (2012)
QXS	XHLB-7	Xiaohalabashan		46.6	1.84	14.16	14.2	0	0.19	9.55	8.4	3.04	1.46	0.44	0.23	100.11	99.88	Xu et al. (2012)
QXS	XTJ-1	Xiaotuerjishan	43	47.06	2.03	13.94	13.76	0	0.18	10.72	9.15	2.42	1.11	0.27	−0.10	100.54	100.64	Xu et al. (2012)
QXS	XTJ-2	Xiaotuerjishan		47.01	2.1	14.07	13.77	0	0.18	10.21	9.25	2.35	1.18	0.28	0.07	100.45	100.4	Xu et al. (2012)
QXS	XTJ-6	Xiaotuerjishan		47.01	2.28	14.36	13.44	0	0.17	9.49	9.18	2.52	1.3	0.33	0.27	100.37	100.08	Xu et al. (2012)
QXS	XTJ-4	Xiaotuerjishan		47.01	2.15	14.08	13.83	0	0.18	10.26	9.19	2.48	1.18	0.3	−0.03	100.62	100.66	Xu et al. (2012)
QXS	DTJ-2	Datuerjishan		48.02	1.97	18.16	9.68	0	0.12	4.34	10.66	3.45	1.34	0.31	2.25	100.3	98.05	Xu et al. (2012)
QXS	DTJ-5	Datuerjishan		48.51	2.09	18.21	9.84	0	0.12	4.2	10.68	3.32	1.42	0.38	1.54	100.31	98.77	Xu et al. (2012)
QXS	DTJ-1	Datuerjishan		48.88	1.6	18.69	8.03	0	0.1	4.25	10.38	3.51	1.35	0.24	3.14	100.18	97.03	Xu et al. (2012)
Yitong	DJS-2	Dongjianshan		44.89	2.23	13.26	13.22	0	0.18	11.01	9.23	3.02	1.89	0.45	0.34	99.71	99.38	Zhang et al. (2006)	东尖山
Yitong	DJS-3	Dongjianshan		44.88	2.15	12.73	13.64	0	0.18	12.15	9.33	2.78	1.77	0.41	0.43	100.44	100.02	Zhang et al. (2006)	东尖山
Yitong	MAS-2	Ma'anshan		45.71	2.14	13.79	12.02	0	0.17	9.62	8.17	3.23	3.08	0.75	1.47	100.15	98.68	Zhang et al. (2006)	马鞍山
Yitong	MAS-3	Ma'anshan		45.1	2.21	13.62	12.1	0	0.18	10.48	8.38	3.53	2.21	0.74	2.05	100.59	98.55	Zhang et al. (2006)	马鞍山
Yitong	DGS-1	Dagushan		45.04	2.45	13.94	12.42	0	0.18	9.35	8.29	3.25	2.82	0.7	1.8	100.24	98.44	Zhang et al. (2006)	大孤山
Yitong	DGS-2	Dagushan		44.96	2.45	14	12.5	0	0.18	9.11	8.2	2.97	3	0.69	1.51	99.57	98.06	Zhang et al. (2006)	大孤山
Yitong	MLQ-1	Moliqingshsan		44.51	2.29	12.35	12.1	0	0.17	11.05	8.75	2.95	2.74	0.73	1.16	99.81	97.64	Zhang et al. (2006)	莫里青山
Yitong	MLQ-3	Moliqingshsan		44.65	2.32	13.42	12.26	0	0.18	11.2	8.86	3.11	2.47	0.73	1.24	100.43	99.2	Zhang et al. (2006)	莫里青山
Yitong	HTS-2	Hengtoushan		48.76	2.04	14.81	10.9	0	0.14	8.04	8.06	3.21	2.08	0.35	1.06	99.45	98.39	Zhang et al. (2006)	横头山
Yitong	HTS-4	Hengtoushan		49.18	2.04	15.63	10.61	0	0.14	7.62	8.16	3.1	2.25	0.39	1.44	100.56	99.12	Zhang et al. (2006)	横头山
Yitong	DT-5	Fufenshang		51.65	1.41	15.66	10.15	0	0.14	7.34	8.41	3.19	0.91	0.23	1.25	100.34	99.09	Zhang et al. (2006)	大屯富丰山
Yitong	DT-8	Fufenshang		51.61	1.42	15.39	10.02	0	0.15	7.05	8.07	3.23	0.91	0.23	1.94	100.04	98.08	Zhang et al. (2006)	大屯富丰山
flood basalt in the central os SB		SB drill	J-1972.8	48.48	2.46	14.16	6.14	3.25	0.14	7.68	4.22	5.41	0.99	0.28	6.24	99.45	93.21	Wang et al. (2009)
flood basalt in the central os SB		SB drill	J-1978.5	47.72	2.7	14.39	6.52	2.68	0.14	7.63	4.91	5.83	0.64	0.64	6.42	100.22	93.8	Wang et al. (2009)
flood basalt in the central os SB		SB drill	J-1982	47.08	2.96	14.3	6.08	3.09	0.14	8.54	3.92	5.76	0.19	0.15	7.2	99.41	92.21	Wang et al. (2009)
Chaihe/HLH		N 47°26'35.86"; E 121°18'21.96"	CEH-2	48.16	2.15	12.96	12.1		0.17	9.97	9.59	2.96	1.64	0.47	-0.32	99.85	100.17	Chen et al. (2017)
Chaihe/HLH		N 47°26'35.86"; E 121°18'21.96"	CEH-3	47.97	2.29	12.78	12.15		0.17	9.98	9.71	2.82	1.52	0.46	-0.02	99.83	99.85	Chen et al. (2017)
Chaihe/HLH		N 47°26'35.86"; E 121°18'21.96"	CEH-5	48.7	2.19	12.87	11.9		0.17	9.58	9.64	3.06	1.6	0.44	-0.35	99.8	100.15	Chen et al. (2017)
Chaihe/HLH		N 47°26'35.86"; E 121°18'21.96"	CEH-8	49.07	2.11	13.16	12.09		0.17	8.89	9.59	3.08	1.32	0.39	-0.15	99.72	99.87	Chen et al. (2017)
Chaihe/HLH		N 47°26'35.86"; E 121°18'21.96"	CEH-11	48.31	2.08	13.01	11.74		0.17	9.63	9.48	2.82	1.54	0.46	0.21	99.45	99.24	Chen et al. (2017)
Chaihe/HLH		N 47°26'35.86"; E 121°18'21.96"	CEH-12	49.14	2.18	13.1	11.87		0.17	9.69	9.68	3.08	1.6	0.45	-0.4	100.56	100.96	Chen et al. (2017)
Chaihe/HLH		N 47°30'23.58"; E 121° 8'35.40"	DLH-1	49.31	1.88	13.07	11.67		0.16	10.3	9.11	3.06	1.23	0.36	-0.47	99.68	100.15	Chen et al. (2017)
Chaihe/HLH		N 47°30'23.58"; E 121° 8'35.40"	DLH-2	48.18	1.91	12.45	12.09		0.17	12	8.79	2.88	1.3	0.39	-0.48	99.68	100.16	Chen et al. (2017)
Chaihe/HLH		N 47°30'23.58"; E 121° 8'35.40"	DLH-6	49.1	1.88	12.82	12.14		0.17	11.15	9.32	2.95	1.18	0.36	-0.6	100.47	101.07	Chen et al. (2017)
Chaihe/HLH		N 47°30'23.58"; E 121° 8'35.40"	DLH-7	49.35	1.9	13.04	12.01		0.16	10.45	9.18	3.08	1.22	0.36	-0.55	100.2	100.75	Chen et al. (2017)
Chaihe/HLH		N 47°30'23.58"; E 121° 8'35.40"	DLH-10	47.63	2.1	12.2	12.11		0.17	11.55	9.34	2.91	1.51	0.46	-0.23	99.75	99.98	Chen et al. (2017)
Chaihe/HLH		N 47°30'31.50"; E 120°52'0.89"	YLTC-1	48.39	2.11	12.73	11.75		0.17	10.2	9.5	3.25	1.45	0.45	-0.11	99.89	100	Chen et al. (2017)
Chaihe/HLH		N 47°30'31.50"; E 120°52'0.89"	YLTC-3	48.33	2.11	12.76	11.79		0.17	10.05	9.53	3.25	1.46	0.44	0	99.89	99.89	Chen et al. (2017)
Chaihe/HLH		N 47°27'24.72"; E 120°38'49.38"	TFL1-3	48.06	2.37	12.72	12.51		0.17	8.75	8.51	3.86	2.38	0.61	-0.34	99.6	99.94	Chen et al. (2017)
Chaihe/HLH		N 47°27'24.72"; E 120°38'49.38"	TFL1-7	49.19	2.36	12.36	12.26		0.16	8.8	7.84	3.73	2.6	0.65	-0.28	99.67	99.95	Chen et al. (2017)
Chaihe/HLH		N 47°27'26.18"; E 120°38'57.89"	TFL2-1	48.7	2.42	13.1	12.68		0.17	7.11	8.1	3.95	2.84	0.75	-0.12	99.7	99.82	Chen et al. (2017)
Chaihe/HLH		N 47°27'26.18"; E 120°38'57.89"	TFL2-2	48.77	2.4	13.02	12.61		0.17	7.39	8.09	3.85	2.82	0.74	-0.06	99.8	99.86	Chen et al. (2017)
Chaihe/HLH		N 47°27'26.18"; E 120°38'57.89"	TFL2-5	48.07	2.55	12.88	13.3		0.18	7.73	8.48	4.08	2.29	0.73	-0.01	100.28	100.29	Chen et al. (2017)
Chaihe/HLH		N 47°29'50.77"; E 120°37'39.61"	DXG-2	48.05	2.11	12.64	12.2		0.17	10.6	9.49	3.18	1.46	0.48	-0.3	100.08	100.38	Chen et al. (2017)
Chaihe/HLH		N 47°29'50.77"; E 120°37'39.61"	DXG-4	47.91	2.1	12.56	12.12		0.17	10.6	9.45	3.2	1.44	0.47	-0.46	99.56	100.02	Chen et al. (2017)
Chaihe/HLH		N 47°29'50.77"; E 120°37'39.61"	DXG-7	48.71	2.09	12.73	12.12		0.17	10.65	9.3	3.14	1.42	0.45	-0.11	100.67	100.78	Chen et al. (2017)
Chaihe/HLH		N 47°24'54.20"; E 120°32'4.58"	GBS-1	50.59	2	13.24	11.83		0.16	8.62	9.08	3.3	1.34	0.37	-0.52	100.01	100.53	Chen et al. (2017)
Chaihe/HLH		N 47°24'54.20"; E 120°32'4.58"	GBS-3	50.15	2	13.28	11.87		0.16	8.65	9.09	3.23	1.26	0.36	-0.42	99.63	100.05	Chen et al. (2017)
Chaihe/HLH		N 47°22'15.10"; E 120°29'8.91"	YTL-3	49.94	1.98	13.22	11.95		0.16	8.71	8.68	3.43	1.52	0.41	-0.52	99.48	100	Chen et al. (2017)
Chaihe/HLH		N 47°22'15.10"; E 120°29'8.91"	YTL-7	49.8	2.04	13.01	12.17		0.17	9.29	8.85	3.38	1.52	0.4	-0.58	100.05	100.63	Chen et al. (2017)
Chaihe/HLH		N 47°22'15.10"; E 120°29'8.91"	YTL-10	48.56	2.03	12.32	12.31		0.17	10.6	8.93	3.13	1.46	0.4	-0.29	99.62	99.91	Chen et al. (2017)
References
Chen, H., Xia, Q. K., Ingrin, J., Deloule, E. & Bi, Y. 2017. Heterogeneous source components of intraplate basalts from NE China induced by the ongoing Pacific slab subduction. Earth Planet. Sci. Lett. 14194. http://dx.doi.org/10.1016/j.epsl.2016.11.030
Fan, Q. C., Liu, R. X. & Sui, J. L. 1999. Petrology and geochemistry of rift type Wudalianchi K-rich volcanic rock zone. Geological Review. 45, 358–369. doi: 10.16509 /j.georeview.1999.s1.044. (in Chinese with English abstract)
Fan, Q. C., Zhao, Y. W., Sui, J. L., Li, D. M. & Wu, Y. 2012. Studies on Quaternary volcanism stages of Nuomin river area in the Great Xing’an Range: Evidence from petrology, K–Ar dating and volcanic geology features. Acta Petrologica Sinica, 28(4), 1092–1098. doi: 1000-0569/2012/028(04)-1092-98. (in Chinese with English abstract)
Gong J., Zhu, C. & Liu J. 2012. Lianhushan Quaternary volcano in Heilongjiang porovnce. Resources survey & Environment. 33(3), 183–190. doi: 1671-4814(2012)03-183-08. (in Chinese with English abstract)
Heilongjiang Geological Survey. 1978. Regional geological survey report. (in Chinese with English abstract)
Li, N., Fan, Q. C., Sun, Q. & Sun, R. B. 2009. Lithogeochemistry of volcanic rocks and hosted melt inclusions in Wudalianchi, Heilongjiang, China. Journal of Earth Science. 20(5), 771–783. DOI: 10.1007/s12583-009-0067-3.
Liu, J. Q., Chen, L. H., Zhong, Y., Lin, W. H. & Wang, X.J. 2017. Petrological, K–Ar chronological and volcanic geological characteristics of Quaternary Xunke high–Mg# andesites from the Lesser Khingan Range. Acta Petrologica Sinica, 33(1): 31–40. (in Chinese with English abstract)
Sun, Y., Ying, J. F., Zhou, X. H., Shao, J. A., Chu, Z. Y. & Su, B. X. 2014. Geochemistry of ultrapotassic volcanic rocks in Xiaogulihe NE China: Implications for the role of ancient subducted sediments. Lithos, 208–209: 53–66. http://dx.doi.org/10.1016/j.lithos.2014.08.026
Wang, C., Du, X. & Liu, J. 1987. Keluo-Wudalianchi-Erkeshan volcanoes. Journal of East China University of Technology (Natural Science). 2. (in Chinese)
Wang, P. J., Gao, Y. F., Ren, Y. G., Liu, W. Z. & Zhang, J. G. 2009. 40Ar/39Ar age and geochemical features of mugearite from the Qingshankou Formation: Significances for basin formation, hydrocarbon generation and petroleum accumulation of the Songliao Basin in Cretaceous. Acta Petrologica Sinica, 25(5): 1178–1190. (in Chinese with English abstract). doi: 1000-0569/2009/025(05)-1178-90.
Xu, Y. G., Zhang, H. H., Qiu, H. H., Ge, W. N. & Wu, F. Y. 2012. Oceanic crust components in continental basalts from Shuangliao, Northeast China: Derived from the mantle transition zone? Chemical Geology. 328: 168–184. doi:10.1016/j.chemgeo.2012.01.027
Zhang, L. Y. 2016. The petrogenesis of Quaternary high–K basaltic rocks from the Northern margin of Songliao Basin, NE, China: The evidence from olivine trace elements. Ph.D Dissertation, Institute of Geology, China Earthquake, Administration (CEA), Beijing. (in Chinese with English abstract)
Zhang, M. 1984. Petrological characteristics of Shilunite of Laoheishan and Huoshaoshan of Wudalianchi, Heilongjiang Province. Earth Science–Journal of Wuhan College of Geology. 24, 87–99.
Zhang, M., Suddaby, P., Thompson, R., Thirlwall, M. & Menzies, M. 1995. Potassic volcanic rocks in NE China: geochemical constraints on mantle source and magma genesis. Journal of Petrology. 36(5), 1275–1303.
Zhang, H. H. 2006. Geochemistry of late Mesozoic–Cenozoic basalts from Yitong–Datun and Shuangliao area, Northeast China: implication for lithospheric evolution and the involvement of the recycled Pacific oceanic crust in basalt genesis. Ph.D Dissertation. Guangzhou Institute of Geochemistry, Chinese Academy of Sciences. Guangzhou.
Zou, H., Reid, M., Liu, Y., Yao, Y., Xu, X. & Fan, Q. 2003. Constraints on the origin of historic potassic basalts from northeast China by U-Th disequilibrium data. Chemical Geology. 200, 189–201. doi:10.1016/S0009-2541(03)00188-8

## Sheet: trace elements
Volcanic field	WDLC
Period	Holocene	Holocene	late Pleistocene	Holocene	Holocene	early-middle Pleistocene		middle Pleistocene																									middle Pleistocene	middle Pleistocene	middle Pleistocene	Holocene	Holocene	Holocene	Holocene	Holocene	Holocene	Holocene	middle Pleistocene	middle Pleistocene	middle Pleistocene	late Pleistocene	late Pleistocene	late Pleistocene	middle Pleistocene
Source	Zou et al. (2003)	Zou et al. (2003)	Zou et al. (2003)	Zou et al. (2003)	Zou et al. (2003)	Zhang et al. (1995)	Zhang et al. (1995)	Zhang et al. (1995)	Qiu et al. (1991)	Qiu et al. (1991)	Qiu et al. (1991)	Qiu et al. (1991)	Xia (1990)	Xia (1990)	Wang et al. (1987)	Wang et al. (1987)	Wang et al. (1987)	Wang et al. (1987)	Chu et al. (2013)	Chu et al. (2013)	Chu et al. (2013)	Chu et al. (2013)	Chu et al. (2013)	Chu et al. (2013)	Chu et al. (2013)	Chu et al. (2013)	Chu et al. (2013)	Chu et al. (2013)	Chu et al. (2013)	Chu et al. (2013)	Chu et al. (2013)	Chu et al. (2013)	this study	this study	this study	this study	this study	this study	this study	this study	this study	this study	Wang et al. (2017)	Wang et al. (2017)	Wang et al. (2017)	Wang et al. (2017)	Wang et al. (2017)	Wang et al. (2017)	Wang et al. (2017)
Volcano	Laoheishan	Laoheishan	Laoheishan	Huoshaoshan	Huoshaoshan	Wohushan	Jiaodebushan	Bijiashan	Wohushan	Wohushan	Xijiaodebushan	Xijiaodebushan	Bijiashan	Yaoquanshan	Wohushan	Wohushan	Jiaodebu	Jiaodebu	Yaoquanshan	Yaoquanshan	Yaoquanshan	Yaoquanshan	Yaoquanshan	Yaoquanshan	Laoheishan	Laoheishan	Laoheishan	Laoheishan	Huoshaoshan	Huoshaoshan	Huoshaoshan	Huoshaoshan	Dongjiaodebushan	Donglongmenshan	Bijiashan	Laoheishan	Huoshaoshan	Laoheishan	Huoshaoshan	Huoshaoshan	Huoshaoshan	Huoshaoshan	?	Donglongmenshan	?	Laoheishan	Laoheishan	Laoheishan	?
Sample no.	LS3-1	LE6-4	LW5-2	HS2-2	HN6-1	W1-32	J-10	B-1a	W1-32	W1-6	J-4	J-11	2	1	W1-6	W1-32	J-11	J-4	YQ1	YQ3	YQ4	YQ6	YQ7	YQ8	LHS1	LHS3	LHS4	LHS6	HSS2	HSS5	HSS6	HSS8	QBLD-2	QLMS-1	17LHS-01F	QLHS-04	QHSS-01	QHSS-05	17HSS-01	17HSS-07	17HSS-08	17HSS-09	WDLC08	WDLC11	WDLC12	WDLC13	WDLC14	WDLC15	WDLC16
Rb	104.4	92	99.9	88.8	84.7	60	63	49											107	111	110	111	110	110	114	112	116	92.3	100	96.6	101	101	54.2808	91.0846	86.5475	85.5537	96.0356	108.209	25.3776	90.8974	90.5484	92.7021	101.368	92.6834	86.4785	101.527	102.445	106.792	100.091
Sr	1494	1379	1479	1737	1350	1339	1565	1325											1428	1486	1454	1470	1457	1456	1478	1447	1458	1752	1601	1641	1330	1336	1282.52	1356.15	1700.1	1123.8	1297.13	1413.29	1278.5	1515.05	1260.15	1409.61	1439.59	1383.95	1587.57	1408.81	1395.79	1502.34	1439.59
Y	23.2	22.8	23.7	27	22.7	21	19.6	18.9											21.8	22.5	22.1	22.2	22.1	22	22.1	21.7	22.2	26.7	24.2	24.4	21.1	21.3	14.9846	17.7222	17.8581	18.6996	19.9641	20.7591	10.7767	22.4021	19.3282	21.2568	21.0412	18.3549	18.2572	20.2304	20.2109	22.7604	20.8849
Zr
Nb	66.6	66.6	70.4	70.6	57.9	60	63	49											66.6	69	68	68.1	68.1	68	67.3	66	68.9	72	70.6	71.5	64.3	64.3	63.0277	73.1418	70.4109	72.6471	83.9695	86.5444	69.1046	88.8853	78.379	85.5379	71.53	58.875	66.572	67.7639	67.0665	73.0897	70.8706
Cs
Ba	1684	1600	1834	1881	1558	1747	1554	1739											1575	1628	1586	1616	1607	1613	1702	1675	1893	1835	1822	1842	1591	1596	1496.24	1756.09	2213.36	1558.11	1653.54	1832.12	1525.46	1883.2	1676.71	1827.45	1555.16	1635.58	1646.02	1642.89	1660.64	1898.78	1558.29
La	94.1	85.8	96.4	111.9	80.1	89.283	79.526	74.4	74.7	63.2	70.2	82.15	58.97	79.36	63.2	74.4	82.15	70.2	84.5	87.5	85.7	86.3	85.8	86.4	85.9	84.5	84	104	91.6	93.1	75.5	76.1	72.4625	82.1195	80.7761	78.0318	83.5024	86.0501	68.6852	106.539	72.605	91.9324	86.4516	74.024	75.465	82.4102	80.915	92.1183	85.639
Ce	169	151	171	195	142	173.79	155.14	149	149	127.1	133.7	164.4	129.3	177.3	127.1	149	164.4	133.7	160	166	162	163	163	162	163	161	160	193	171	174	143	144	131.389	146.914	144.789	137.645	147.401	155.396	145.475	188.381	128.805	164.691	159.488	137.32	140.196	152.658	151.1	169.913	158.529
Pr	18.9	16.9	19.1	21.8	16.1	19.087	16.848	15.77	15.77	13.46	14.8	17.19	13.01	17.89	13.46	15.77	17.19	14.6	18.5	19.1	18.7	18.8	18.7	18.7	18.9	18.4	18.5	22.3	19.8	20.1	16.5	16.7	15.0825	16.3399	16.5166	15.7482	16.8739	17.5593	15.4071	20.9882	14.6453	18.6619	18.113	15.7624	16.0641	17.3462	17.1074	19.3071	17.9119
Nd	68.4	62.1	69.7	80	59.4	71.96	63.426	60.64	60.64	52.29	54	65.2	51.07	68.44	52.29	60.64	65.2	54	67.7	70	68.6	69.3	69.2	69.3	69.8	68.6	68	83.2	74	75.1	61.7	62.7	58.5928	62.6712	65.4716	62.6216	65.7405	65.8381	59.4608	79.5969	57.1589	71.4123	70.1056	61.6602	63.2701	67.0648	66.2343	74.2836	68.6363
Sm	11.8	11	12	13.9	10.7	12.227	10.07	10.48	10.48	9.27	9.4	11.03	8.43	10.54	9.27	10.43	11.03	9.4	11.2	11.6	11.3	11.5	11.5	11.4	11.6	11.4	11.2	13.9	12.5	12.8	10.6	10.7	9.76817	10.8421	11.2911	10.7123	11.3232	10.8548	10.1245	13.5183	9.97916	11.9747	11.5299	10.3933	10.6454	11.0723	10.9333	12.0047	11.2667
Eu	3.15	2.94	3.23	3.75	2.93	3.626	2.916	2.84	2.8	2.51	2.6	2.91	2.8	3.46	2.51	2.84	2.91	2.6	3.18	3.28	3.21	3.23	3.21	3.22	3.27	3.21	3.19	3.98	3.66	3.71	3.05	3.08	3.11228	3.36456	3.89574	3.35176	3.48756	3.29694	3.08189	4.14988	3.15394	3.81857	3.26179	2.96215	3.05519	3.12223	3.07161	3.36988	3.16875
Gd	8.29	7.94	8.62	9.81	7.84	10.014	7.762	8.16	8.16	7.35	5.5	8.14	6.25	7.63	7.35	8.16	8.14	5.5	8.87	9.14	8.86	8.93	8.92	8.91	9.05	8.77	8.82	11.1	10	10.3	8.43	8.56	7.7455	8.78247	8.98409	8.59642	9.0801	8.84994	7.97087	11.0138	8.28706	10.0558	8.96184	8.09178	8.19837	8.59809	8.46885	9.2683	8.78064
Tb	1	0.97	1.04	1.19	0.97	1.249	0.879	0.75	0.75	0.87	1.5	0.67	0.91	1.11	0.81	0.75	0.67	1.5	1.01	1.03	1.01	1.02	1.03	1.02	1.03	1	0.99	1.25	1.15	1.17	0.98	0.99	1.003	1.11058	1.16139	1.12628	1.17413	1.11618	1.01787	1.41621	1.05666	1.30926	1.04039	0.948621	0.945999	1.00853	0.995685	1.07277	1.01823
Dy	4.74	4.7	4.9	5.64	4.64	4.778	3.678	4.04	4.04	3.78	3.4	4.08	4.33	5.01	3.78	4.04	4.08	3.4	5.14	5.28	5.22	5.24	5.17	5.19	5.22	5.06	5.08	6.35	5.74	5.88	4.96	4.98	4.19317	4.63976	4.71294	4.94972	4.95223	4.82931	4.35377	5.90416	4.59928	5.50018	5.18368	4.64027	4.60697	4.91597	4.94793	5.33152	5.07047
Ho	0.77	0.76	0.8	0.9	0.75	1.019	0.798	0.68	0.68	0.63	1.1	0.7	0.66	0.76	0.63	0.68	0.7	1.1	0.818	0.843	0.831	0.828	0.831	0.829	0.829	0.815	0.817	1.001	0.913	0.926	0.801	0.812	0.647871	0.705639	0.751804	0.802592	0.797717	0.760058	0.706872	0.917835	0.739256	0.869554	0.827402	0.71226	0.707694	0.793159	0.772043	0.851087	0.813848
Er	1.78	1.76	1.84	2.03	1.72	2.205	1.866	1.65	1.65	1.54	1.4	1.63	1.57	1.78	1.54	1.65	1.63	1.4	1.97	2.03	1.99	1.97	1.97	1.96	1.98	1.92	1.95	2.33	2.12	2.14	1.89	1.9	1.58965	1.72595	1.86806	1.99292	1.99986	1.90475	1.75509	2.26886	1.87064	2.20802	2.03109	1.7143	1.70309	1.91896	1.90354	2.06053	1.99325
Tm	0.22	0.22	0.23	0.24	0.22	0.257	0.217	0.1	0.1	0.1	0.15	0.1	0.21	0.19	0.1	0.1	0.1	0.15	0.232	0.244	0.236	0.237	0.236	0.24	0.236	0.228	0.231	0.269	0.248	0.25	0.225	0.224	0.20319	0.217484	0.241234	0.260535	0.26258	0.236623	0.21772	0.287071	0.24021	0.275974	0.237163	0.194592	0.195553	0.228649	0.222606	0.2476	0.23167
Yb	1.21	1.2	1.24	1.31	1.23	1.328	1.149	0.92	0.92	0.92	0.73	0.87	1.09	1.18	0.92	0.92	0.87	0.73	1.31	1.34	1.31	1.31	1.32	1.33	1.29	1.29	1.3	1.46	1.34	1.34	1.24	1.28	1.06259	1.21574	1.30498	1.43022	1.41768	1.30036	1.16319	1.54771	1.29687	1.47755	1.33534	1.09755	1.07813	1.27331	1.25738	1.36691	1.31899
Lu	0.18	0.17	0.18	0.18	0.18	0.199	0.186	0.15	0.15	0.23	0.1	0.21	0.24	0.24	0.23	0.15	0.21	0.1	0.174	0.18	0.174	0.175	0.171	0.179	0.173	0.171	0.176	0.198	0.18	0.179	0.17	0.172	0.140776	0.158355	0.172885	0.194053	0.194496	0.181047	0.155477	0.206222	0.174828	0.19812	0.17955	0.144211	0.138104	0.167101	0.164026	0.182479	0.171056
Pb	14.5	12.2	14	12.2	10.5														16.4	17.5	16.5	16.4	16.2	16.6	16.1	15.8	16.2	14.3	13.6	13.8	13.5	13.9	10.0971	14.3598	15.4052	12.6389	13.6948	16.6586	29.6903	16.3307	13.6477	15.8205	15.7675	14.1577	10.3631	14.543	14.2128	15.052	15.1896
Th	5.74	6.5	6.51	7.51	5.71	6	7	5											7.45	7.64	7.47	7.42	7.37	7.31	6.97	6.82	6.1	9.26	8.77	8.93	7.37	7.44	5.34431	7.01498	6.76885	7.77714	6.68149	7.29362	6.57173	9.35269	7.84917	8.0905	7.68753	6.59279	6.67303	6.80773	6.802	6.30764	7.49982
U	1.23	1.35	1.4	1.47	1.16	—	1.3	—											1.63	1.67	1.65	1.61	1.59	1.6	1.55	1.5	1.34	1.85	1.78	1.79	1.59	1.58	1.28987	1.18408	1.08585	1.47305	1.54575	1.4347	1.40461	1.72479	1.37837	1.63842	1.58705	1.25802	1.11859	1.41481	1.45582	1.30518	1.55971
Chen, H., Xia, Q. K., Ingrin, J., Deloule, E. & Bi, Y. 2017. Heterogeneous source components of intraplate basalts from NE China induced by the ongoing Pacific slab subduction. Earth Planet. Sci. Lett. 14194. http://dx.doi.org/10.1016/j.epsl.2016.11.030
Chu, Z., Harvey, J., Liu, C., Guo, J., Wu, F., Tian, W., Zhang, Y. & Yang, Y. 2013. Source of highly potassic basalts in northeast China: Evidence from Re–Os, Sr–Nd–Hf isotopes and PGE geochemistry. Chemical Geology. 357, 52–66. http://dx.doi.org/10.1016/j.chemgeo.2013.08.007.
Fan, Q. C., Liu, R. X. & Sui, J. L. 1999. Petrology and geochemistry of rift type Wudalianchi K-rich volcanic rock zone. Geological Review. 45, 358–369. doi: 10.16509 /j.georeview.1999.s1.044. (in Chinese with English abstract)
Gong J., Zhu, C. & Liu J. 2012. Lianhushan Quaternary volcano in Heilongjiang porovnce. Resources survey & Environment. 33(3), 183–190. doi: 1671-4814(2012)03-183-08. (in Chinese with English abstract)
Qiu, J. X. 1991. Wudlianchi–Keluo–Erkeshan potassium-rich volcanic rocks. China University of Geosciences Press. Wuhan. (in Chinese with English abstract)
Sun, Y., Ying, J. F., Zhou, X. H., Shao, J. A., Chu, Z. Y. & Su, B. X. 2014. Geochemistry of ultrapotassic volcanic rocks in Xiaogulihe NE China: Implications for the role of ancient subducted sediments. Lithos, 208–209: 53–66. http://dx.doi.org/10.1016/j.lithos.2014.08.026
Wang, C., Du, X. & Liu, J. 1987. Keluo-Wudalianchi-Erkeshan volcanoes. Journal of East China University of Technology (Natural Science). 2. (in Chinese)
Wang, X. J., Chen, L. H., Hofmann, A. W., Mao F. G., Liu, J. Q., Zhong, Y., Xie L. W. & Yang Y. H. 2017. Mantle transition zone-derived EM1 component beneath NE China: Geochemical evidence from Cenozoic potassic basalts. Earth Planet. Sci. Lett. 465, 16–28. http://dx.doi.org/10.1016/j.epsl.2017.02.028
Xia, L. Q. 1990. On the evolution of volcanic magma from Wudalianchi, China. Acta Petrologica Sinica. 1: 13–29. (in Chinese with English abstract)
Zhang, L. Y. 2016. The petrogenesis of Quaternary high–K basaltic rocks from the Northern margin of Songliao Basin, NE, China: The evidence from olivine trace elements. Ph.D Dissertation, Institute of Geology, China Earthquake, Administration (CEA), Beijing. (in Chinese with English abstract)
Zhang, M., Suddaby, P., Thompson, R., Thirlwall, M. & Menzies, M. 1995. Potassic volcanic rocks in NE China: geochemical constraints on mantle source and magma genesis. Journal of Petrology. 36(5), 1275–1303.
Zou, H., Reid, M., Liu, Y., Yao, Y., Xu, X. & Fan, Q. 2003. Constraints on the origin of historic potassic basalts from northeast China by U-Th disequilibrium data. Chemical Geology. 200, 189–201. doi:10.1016/S0009-2541(03)00188-8
[truncated: 96 more columns]

## Sheet: isotopes
Volcanic field	Volcano	Sample no.	87Sr/86Sr	143Nd/144Nd	206Pb/204Pb	207Pb/204Pb	208Pb/204Pb	Source
WDLC	Yaoquanshan	82H-2	0.705441±0.000032	0.512381±11	16.732	15.382	36.542	Wang & Xie (1992)
WDLC	Laoheishan	82H-4	0.705265±0.000026	0.512418±18	16.874	15.407	36.761	Wang & Xie (1992)
WDLC	Huoshaoshan	82H-6	0.705100±0.000020	0.512433±15	16.996	15.382	36.948	Wang & Xie (1992)
WDLC	LHS	LS3-1	0.705365	0.51238	16.83	15.437	36.775	Zou et al. 2003
WDLC	LHS	LE6-4	0.705189	0.512433	17.009	15.445	37.06	Zou et al. 2003
WDLC	LHS	LHK-1	0.705207	0.512425	16.968	15.44	37	Zou et al. 2003
WDLC	LHS	LW5-2	0.705295	0.512411	16.988	15.47	37.002	Zou et al. 2003
WDLC	LHS	HL9720	0.705356	0.512383	16.858	15.449	36.846	Zou et al. 2003
WDLC	LHS	NDW2-2b	0.70535	0.51239	16.907	15.475	36.953	Zou et al. 2003
WDLC	HSS	HK-2	0.705111	0.512443	17.047	15.431	37.13	Zou et al. 2003
WDLC	HSS	HS2-2	0.705054	0.512447	17.108	15.461	37.286	Zou et al. 2003
WDLC	HSS	HN6-1	0.705099	0.512439	17.045	15.482	37.216	Zou et al. 2003
WDLC	LHS	WDLC01	0.705147	0.512439	17.0484	15.4348	37.1371	Wang et al. (2017)
WDLC	LHS	WDLC02	0.705277	0.512408	16.9436	15.4499	36.97	Wang et al. (2017)
WDLC	LHS	WDLC03	0.705171	0.512418	17.0416	15.4396	37.1053	Wang et al. (2017)
WDLC	HSS	WDLC05	0.705181	0.512337	16.9261	15.4404	36.9559	Wang et al. (2017)
WDLC	HSS	WDLC06	0.705176	0.512412	17.0092	15.4431	37.0857	Wang et al. (2017)
WDLC	HSS	WDLC07	0.705299	0.512418	17.1031	15.4358	37.0998	Wang et al. (2017)
WDLC	?	WDLC08	0.705393	0.51236	16.8348	15.4349	36.7861	Wang et al. (2017)
WDLC	LHS	WDLC13	0.705413	0.512349	16.8527	15.4437	36.8019	Wang et al. (2017)
WDLC	Wohushan	W1-32	0.70527±1	—	16.966	15.399	36.811	Zhang et al. (1995)
WDLC	Laoheishan	L-13	0.70538±1	0.512383±4	16.805	15.428	36.759	Zhang et al. (1995)
WDLC	Laoheishan	A-4	0.70541±1	—	16.9	15.447	36.89	Zhang et al. (1995)
WDLC	YQS	YQ1	0.705371	0.512408				Chu et al. 2013
WDLC	YQS	YQ3	0.705412	0.512414				Chu et al. 2013
WDLC	YQS	YQ4	0.70537	0.512429				Chu et al. 2013
WDLC	YQS	YQ6	0.705383	0.512428				Chu et al. 2013
WDLC	YQS	YQ7	0.705439	0.512423				Chu et al. 2013
WDLC	YQS	YQ8	0.70542	0.512439				Chu et al. 2013
WDLC	LHS	LHS1	0.70541	0.512407				Chu et al. 2013
WDLC	LHS	LHS3	0.705414	0.512399				Chu et al. 2013
WDLC	LHS	LHS4	0.705579	0.5124				Chu et al. 2013
WDLC	LHS	LHS6	0.705133	0.512464				Chu et al. 2013
WDLC	HSS	HSS2	0.705184	0.512474				Chu et al. 2013
WDLC	HSS	HSS5	0.70513	0.512453				Chu et al. 2013
WDLC	HSS	HSS6	0.705273	0.512432				Chu et al. 2013
WDLC	HSS	HSS8	0.705241	0.512418				Chu et al. 2013
WDLC	Laoheishan	10HLJ17	0.705293	0.512481	17.16	15.409	37.069	Zhang (2016)
WDLC	Weishan	10HLJ22	0.705188	0.512452	16.951	15.396	36.88	Zhang (2016)
WDLC	Dongjiaodebushan	10HLJ23	0.705062	0.512497	16.999	15.403	36.912	Zhang (2016)
KL	Dangzishan	DZ-4	0.70500±1	0.512497±3	17.008	15.41	37.04	Zhang et al. (1995)
KL	Dangzishan	DZ-3	0.70520±1	0.512448±5	17.046	15.411	37.204	Zhang et al. (1995)
KL		ST-M	0.70527±1	—	16.842	15.382	36.511	Zhang et al. (1995)
KL	Gushan	G-1a	0.70549±1	0.512358±6	16.721	15.418	36.628	Zhang et al. (1995)
KL	Heishan	H-38	0.70507±1	0.512451±4	17.058	15.436	37.189	Zhang et al. (1995)
KL		MH-1	0.70549±1	—	16.607	15.352	37.151	Zhang et al. (1995)
KL	Pingdingshan	10HLJ39	0.705116	0.512397	17.082	15.377	37	Zhang (2016)
KL	Daheishan	10HLJ40	0.705144	0.512396	17.734	15.484	37.769	Zhang (2016)
KL	Shitougouzi	10HLJ41	0.704973	0.512439	17.096	15.388	37.006	Zhang (2016)
KL	Muhenanshan	10HLJ42	0.705336	0.512372	16.767	15.362	36.558	Zhang (2016)
KL	Dangzishan	09HLJ14	0.705169	0.512452	17.055	15.364	37.024	Zhang (2016)
KL	Jianshan	09HLJ32	0.705128	0.512458	17.154	15.402	37.114	Zhang (2016)
KL	Shitougouzi	10HLJ02	0.705552	0.512367	16.743	15.405	36.599	Zhang (2016)
EKS		KD1	0.705589	0.512362				Chu et al. 2013
EKS		KD3	0.705657	0.512342				Chu et al. 2013
EKS		KD4	0.705637	0.512344				Chu et al. 2013
EKS		KD5	0.705626	0.512347				Chu et al. 2013
EKS	Xiaoshan	10HLJ26	0.705501	0.512392	16.789	15.383	36.666	Zhang (2016)
Beijianshan	Beijianshan	10HLJ35	0.705442	0.512403	16.881	15.392	36.772	Zhang (2016)
?/EWK		RB-53	0.70553±1	0.512316±25	16.789	15.397	36.776	Zhang et al. (1995)
EKS	Erkeshan	ER-8	0.70565±1	—	16.841	15.376	36.67	Zhang et al. (1995)
XGLH	Maanshan	10HLJ08	0.705563	0.512338	16.546	15.366	36.369	Zhang (2016)
XGLH		GLH12-02	0.705646	0.51236	16.468	15.424	36.447	sun et al. 2014
XGLH		GLH12-03	0.705585	0.512385	16.443	15.395	36.353	sun et al. 2014
XGLH		GLH12-04	0.705546	0.512378	16.47	15.393	36.379	sun et al. 2014
XGLH		GLH12-05	0.705719	0.512315	16.496	15.398	36.411	sun et al. 2014
XGLH		GLH12-06	0.705536	0.512366	16.496	15.412	36.446	sun et al. 2014
XGLH		GLH12-07	0.705424	0.512376	16.514	15.398	36.414	sun et al. 2014
XGLH		GLH12-08	0.705464	0.512355	16.52	15.421	36.491	sun et al. 2014
XGLH		GLH12-09	0.705522	0.512386	16.474	15.402	36.404	sun et al. 2014
XGLH		GLH12-10	0.705442	0.512388	16.535	15.464	36.607	sun et al. 2014
XGLH		GLH12-11	0.705465	0.512402	16.552	15.449	36.578	sun et al. 2014
XGLH		GLH12-12	0.705509	0.512383	16.479	15.421	36.457	sun et al. 2014
XGLH		GLH12-13	0.705471	0.512409	16.503	15.411	36.445	sun et al. 2014
XGLH		GLH12-14	0.705538	0.512396	16.5	15.418	36.465	sun et al. 2014
XGLH		GLH12-15	0.705526	0.512372	16.494	15.438	36.505	sun et al. 2014
XGLH		GLH12-16	0.705336	0.512423	16.496	15.435	36.496	sun et al. 2014
XGLH		GLH12-17	0.705631	0.512371	16.486	15.458	36.556	sun et al. 2014
XGLH		GLH12-18	0.705595	0.512391	16.46	15.415	36.425	sun et al. 2014
NMH		13NM05	0.704789	0.512497	17.364	15.46	37.48	Liu et al. 2017
NMH		13NM13	0.704833	0.512475	17.066	15.422	37.123	Liu et al. 2017
NMH		13NM18	0.704733	0.512497	17.136	15.429	37.264	Liu et al. 2017
NMH		13NM26	0.704742	0.512461	17.117	15.425	37.18	Liu et al. 2017
NMH		13NM27	0.704768	0.512526	17.17	15.431	37.289	Liu et al. 2017
NMH		13NM34	0.704671	0.512534	17.104	15.43	37.126	Liu et al. 2017
NMH		08NM01	0.704855	0.512532	17.106	15.434	37.139	Zhao et al. 2014
NMH		08NM08	0.704661	0.512595	17.079	15.43	37.119	Zhao et al. 2014
NMH		08NM11	0.704782	0.512596	17.233	15.431	37.344	Zhao et al. 2014
NMH		09NM16	0.704769	0.512493	17.036	15.418	37.109	Zhao et al. 2014
NMH		08NM04	0.704766	0.512511	17.095	15.428	37.194	Zhao et al. 2014
NMH		09NM15	0.704837	0.512498	17.009	15.423	37.033	Zhao et al. 2014
NMH		08NM12	0.704826	0.51251	17.153	15.429	37.314	Zhao et al. 2014
NMH		08NM23	0.70488	0.512485	17.02	15.42	37.157	Zhao et al. 2014
QXS		BBT-3	0.0885	0.512875				Xun et al. 2012
QXS		BLS-5	0.0974	0.512929				Xun et al. 2012
QXS		DHLB-1	0.085	0.512872				Xun et al. 2012
QXS		DHLB-8	0.1772	0.512896				Xun et al. 2012
QXS		DTJ-5	0.0689	0.512858				Xun et al. 2012
QXS		NBS-3	0.0666	0.512882				Xun et al. 2012
QXS		NBS-4	0.094	0.512893				Xun et al. 2012
QXS		XHLB-1	0.1289	0.51285				Xun et al. 2012
QXS		XHLB-7	0.1089	0.512862				Xun et al. 2012
QXS		XTJ-1	0.1166	0.512837				Xun et al. 2012
QXS		XTJ-6	0.1427	0.512868				Xun et al. 2012
YT	Dongjianshan	DJS-2	0.70415	0.512803				Zhang (2006)
YT	Ma'anshan	MAS-2	0.703791	0.512854				Zhang (2006)
YT	Dagushan	DGS-1	0.703721	0.512855				Zhang (2006)
YT	Moliqingshan	MLQ-3	0.704009	0.5128				Zhang (2006)
YT	Hengtoushan	HTS-2	0.703989	0.512848				Zhang (2006)
YT	Hengtoushan	HTS-4	0.703922	0.512802				Zhang (2006)
YT	Fufengshan	DT-5	0.704344	0.512672				Zhang (2006)
YT	Fufengshan	DT-8	0.704822	0.512709				Zhang (2006)
HLH/Wuchagou		WG-01B	0.706728	0.51185				Ho et al. 2013
HLH/Wuchagou		WG-02A	0.705392	0.512218				Ho et al. 2013
HLH/Wuchagou		WG-03A	0.705854	0.512167				Ho et al. 2013
HLH/Wuchagou		WG-04A	0.706112	0.512001				Ho et al. 2013
HLH/Wuchagou		WG-05B	0.706019	0.512177				Ho et al. 2013
HLH/Wuchagou		WG-06A	0.705994	0.512082				Ho et al. 2013
HLH/Wuchagou		WG-07	0.706112	0.511994				Ho et al. 2013
HLH/Wuchagou		WG-09B	0.705353	0.51223				Ho et al. 2013
HLH/Wuchagou		WG-11A	0.706168	0.511773				Ho et al. 2013
Halaha		TC-03	0.703486	0.51292				Ho et al. 2013
Halaha		TC-04	0.70356	0.512885				Ho et al. 2013
Halaha		TC-05	0.70348	0.512975				Ho et al. 2013
Halaha		CH-04	0.703829	0.51287				Ho et al. 2013
Halaha		CH-06	0.703928	0.512819				Ho et al. 2013
Halaha		CH-09	0.704103	0.512812				Ho et al. 2013
Halaha		CH-10	0.704172	0.512899				Ho et al. 2013
Halaha		CH-13	0.703601	0.512949				Ho et al. 2013
Chu, Z., Harvey, J., Liu, C., Guo, J., Wu, F., Tian, W., Zhang, Y. & Yang, Y. 2013. Source of highly potassic basalts in northeast China: Evidence from Re–Os, Sr–Nd–Hf isotopes and PGE geochemistry. Chemical Geology. 357, 52–66. http://dx.doi.org/10.1016/j.chemgeo.2013.08.007.
Ho, K.S., Ge, W.C., Chen, J.C., You, C.F., Yang, H.J. & Zhang, Y.L. 2013. Late Cenozoic magmatic transitions in the central Great Xing'an Range, Northeast China: geochemical and isotopic constraints on petrogenesis. Chemical Geology, 352: 1–18
Liu, J. Q., Chen, L. H., Zhong, Y., Lin, W. H. & Wang, X.J. 2017a. Petrological, K–Ar chronological and volcanic geological characteristics of Quaternary Xunke high–Mg# andesites from the Lesser Khingan Range. Acta Petrologica Sinica, 33(1): 31–40. (in Chinese with English abstract)
Sun, Y., Ying, J. F., Zhou, X. H., Shao, J. A., Chu, Z. Y. & Su, B. X. 2014. Geochemistry of ultrapotassic volcanic rocks in Xiaogulihe NE China: Implications for the role of ancient subducted sediments. Lithos, 208–209: 53–66. http://dx.doi.org/10.1016/j.lithos.2014.08.026
Wang, J. & Xie, G. 1992. The Geochemistry of Wudalianchi Potassic Lava. In: Liu, R. (ed) Chronology and Geochemistry of Cenozonic Volcanic Rocks in China. Seismological Press, Beijing. 213–227 (in Chinese)
Wang, X. J., Chen, L. H., Hofmann, A. W., Mao F. G., Liu, J. Q., Zhong, Y., Xie L. W. & Yang Y. H. 2017. Mantle transition zone-derived EM1 component beneath NE China: Geochemical evidence from Cenozoic potassic basalts. Earth Planet. Sci. Lett. 465, 16–28. http://dx.doi.org/10.1016/j.epsl.2017.02.028
Xu, Y. G., Zhang, H. H., Qiu, H. H., Ge, W. N. & Wu, F. Y. 2012. Oceanic crust components in continental basalts from Shuangliao, Northeast China: Derived from the mantle transition zone? Chemical Geology. 328: 168–184. doi:10.1016/j.chemgeo.2012.01.027
Zhang, H. H. 2006. Geochemistry of late Mesozoic–Cenozoic basalts from Yitong–Datun and Shuangliao area, Northeast China: implication for lithospheric evolution and the involvement of the recycled Pacific oceanic crust in basalt genesis. Ph.D Dissertation. Guangzhou Institute of Geochemistry, Chinese Academy of Sciences. Guangzhou.
Zhang, L. Y. 2016. The petrogenesis of Quaternary high–K basaltic rocks from the Northern margin of Songliao Basin, NE, China: The evidence from olivine trace elements. Ph.D Dissertation, Institute of Geology, China Earthquake, Administration (CEA), Beijing. (in Chinese with English abstract)
Zhang, M., Suddaby, P., Thompson, R., Thirlwall, M. & Menzies, M. 1995. Potassic volcanic rocks in NE China: geochemical constraints on mantle source and magma genesis. Journal of Petrology. 36(5), 1275–1303.
Zhao Y. W., Fan Q. C., Zou H. B. & Li N. 2014. Geochemistry of Quaternary basaltic lavas from the Nuomin volcanic field, Inner Mongolia: Implications for the origin of potassic volcanic rocks in Northeastern China. Lithos 196–197, 169-180.
Zou, H., Reid, M., Liu, Y., Yao, Y., Xu, X. & Fan, Q. 2003. Constraints on the origin of historic potassic basalts from northeast China by U-Th disequilibrium data. Chemical Geology. 200, 189–201. doi:10.1016/S0009-2541(03)00188-8
